# Supplementary material for: A large-scale screening identifies receptor-like kinases with common features in kinase domains that are potentially related to disease resistance in planta
Source: Front Plant Sci. 2024 Nov 13;15:1503773. doi: 10.3389/fpls.2024.1503773 (PMC11598347; doi:10.3389/fpls.2024.1503773)
Supplement: Supplementary file 3 [file Table1.xlsx]

## Sheet: Sheet1
Supplementary Table 1. List of 133 rRLKs
NT Domain	KD Domain	Note	Immune intensity	KD location	KD length (AA)
FLS2 (1-829 aa)	At1g68400		*	301-670	370
	At1g55610	BRL1	*	800-1166	367
	At1g12460		*	537-882	346
	At3g47110		*	680-1025	346
	At3g08680		*	283-640	358
	At3g02880	KIN7	*	276-627	352
	At2g45340		*	336-691	356
	At2g37050	SIMP1	*	553-934	382
	At2g35620	FEI2	*	261-589	329
	At2g28990		*	530-884	355
	At2g07040	PRK2	*	268-647	380
	At1g74360	NILR1	*	755-1106	352
	At4g30520	CIK3; SARK	*	263-648	386
	At5g07280	EMS1	*	849-1192	344
	At4g23740		*	280-638	359
	At5g44700	GASSHO2	*	899-1252	354
	At3g02130	RPK2	*	835-1151	317
	At5g65710	HSL2	*	654-993	340
	At1g17750	PEPR2	**	761-1088	328
	At2g13790	SERK4	**	255-620	366
	At2g01950	BRL2	**	779-1143	365
	At4g28490	HAESA	**	645-999	355
	At3g47570		**	667-1010	344
	At5g63930	PSYR3	**	761-1102	342
	At1g72460			273-644	372
	At1g72300			740-1095	356
	At1g72180			642-977	336
	At1g71830			263-625	363
	At1g69990			239-591	353
	At1g69270			222-540	319
	At2g41820			558-890	333
	At1g62950			541-890	350
	At1g60800			262-632	371
	At1g60630			277-652	376
	At1g51820			529-885	357
	At1g51800			537-894	358
	At1g50610			305-686	382
	At1g48480			291-655	365
	At1g34420			636-966	331
	At1g28440			642-996	355
	At1g27190			247-601	355
	At1g25320			339-702	364
	At1g11130			365-768	404
	At1g09970			632-977	346
	At1g08590			667-1029	363
	At2g02220			681-1008	328
	At1g73080			793-1123	331
	At4g29450			537-863	327
	At3g14350			313-717	405
	At3g03770			413-802	390
	At5g49770			586-946	361
	At2g36570			293-672	380
	At2g33170			777-1124	348
	At2g31880			307-641	335
	At2g28960			533-880	348
	At2g25790			659-960	302
	At2g24230			479-853	375
	At2g23950			258-634	377
	At2g23300			357-773	417
	At2g20850			338-775	438
	At2g19190			540-876	337
	At2g14510			540-876	337
	At2g13800			237-601	365
	At2g02780			375-742	368
	At2g01820			506-943	438
	At5g58300			306-654	349
	At1g79620			614-997	384
	At1g78980			296-699	404
	At1g75820			660-980	321
	At5g16000			272-638	367
	At5g10290			247-613	367
	At5g10020			623-1048	426
	At5g07180			608-967	360
	At5g06820			317-753	437
	At5g05160			288-640	353
	At5g01890			631-967	337
	At4g39400			815-1196	382
	At4g37250			353-768	416
	At4g36180			779-1136	358
	At4g34220			362-757	396
	At4g31250			270-676	407
	At4g26540			725-1091	367
	At4g22730			335-688	354
	At3g50230			330-672	343
	At4g20790			240-518	279
	At4g20450			562-898	337
	At4g20140			899-1249	351
	At4g18640			343-678	336
	At4g08850			733-1045	313
	At3g57830			300-662	363
	At3g51740			483-836	354
	At4g22130			311-703	393
	At3g49670			658-1002	345
	At3g42880			271-633	363
	At3g28040			668-1016	349
	At3g17840			289-647	359
	At3g14840			637-1020	384
	At4g20270			679-992	314
	At3g13065			300-687	388
	At4g29990			535-876	342
	At5g67280			361-751	391
	At5g63710			249-615	367
	At5g63410			339-680	342
	At5g62710			264-604	341
	At5g61480			675-1041	367
	At5g59680			532-887	356
	At5g59670			523-868	346
	At5g58150			460-785	326
	At5g53890			701-1036	336
	At5g51560			330-680	351
	At5g51350			614-895	282
	At5g49760			583-953	371
	At5g49660			614-966	353
	At5g48940			746-1135	390
	At5g48740			570-895	326
	At5g48380			250-620	371
	At5g45800			321-666	346
	At5g43020			305-669	365
	At5g35390			280-662	383
	At5g25930			652-1005	354
	At5g24100			274-614	341
	At5g20690			288-659	372
	At5g20480			673-1031	359
	At5g16900			538-866	329
	At2g26730			282-658	377
	At1g51810			407-744	338
	At1g67720			558-929	372
	At1g29750			648-1021	374
	At2g15300			359-744	386
	At1g29720			640-1019	380
	At1g07650			650-1020	371
	At1g06840			584-953	370
	At5g62230			605-966	362
	At5g46330	FLS2, Positive control	**	830-1173	344
	/	Negative control
