# Supplementary material for: A large-scale screening identifies receptor-like kinases with common features in kinase domains that are potentially related to disease resistance in planta
Source: Front Plant Sci. 2024 Nov 13;15:1503773. doi: 10.3389/fpls.2024.1503773 (PMC11598347; doi:10.3389/fpls.2024.1503773)
Supplement: Supplementary file 4 [file Table2.xlsx]

## Sheet: Sheet1
Supplementary Table 2. List of 13 confirmed LRR-RLKs from other species
Gene	Specie	KD location	KD length (AA)	Note
LOC103845674	Brassica rapa (field mustard)	673-1031	359	BrEFR[53]
LOC100253808	Vitis vinifera (wine grape)	834-1171	338	VvFLS2[54]
LOC101263667	Solanum lycopersicum (tomato)	833-1169	337	LeFLS2[55]
LOC103839616	Brassica rapa (field mustard)	831-1174	344	BrFLS2
LOC106318306	Brassica oleracea (wild cabbage)	835-1176	342	BoFLS2
LOC101248095	Solanum lycopersicum (tomato)	819-1140	322	SlFLS3[56]
LOC101257150	Solanum lycopersicum (tomato)	804-1115	312	SlSYR1[57]
LOC101257447	Solanum lycopersicum (tomato)	799-1115	317	SlSYR2[58]
LOC101257348	Solanum lycopersicum (tomato)	646-1003	358	SlCORE[59]
LOC106371753	Brassica napus (rape)	673-1031	359	BrEFR
LOC103434977	Malus domestica (apple)	827-1157	331	MdFLS2
LOC110108328	Dendrobium catenatum	847-1177	331	DcFLS2
LOC100381406	Zea mays	781-1123	343	ZmFLS2[60]
