# Supplementary material for: A large-scale screening identifies receptor-like kinases with common features in kinase domains that are potentially related to disease resistance in planta
Source: Front Plant Sci. 2024 Nov 13;15:1503773. doi: 10.3389/fpls.2024.1503773 (PMC11598347; doi:10.3389/fpls.2024.1503773)
Supplement: Supplementary file 5 [file Table3.xlsx]

## Sheet: Sheet1
Supplementary Table 3. High conserved sites of 24 KD-p in the alignment result
Aligned site	Amino acid	Conservation	Similar site with 109 KD-n (Consensus){Conservation}	Similar site with KD-F-O (Consensus){Conservation}
112	I	:	/	K-F-O-a-60I (:)
113	G	*	/	K-F-O-a-61G (*)
115	G	.	/	K-F-O-a-63[GS] (.)
118	G	.	/	K-F-O-a-66[GS] (.)
121	Y	:	/	K-F-O-a-69Y (:)
133	A	.	/	K-F-O-a-81A (*)
134	V	:	KD109-a-263V (:)	K-F-O-a-82V (:)
135	K	*	/	K-F-O-a-83K (*)
137	L	:	/	K-F-O-a-85L (:)
158	F	:	/	K-F-O-a-98F (:)
165	L	:	/	K-F-O-a-105L (:)
176	H	*	KD109-a-305H (.)	K-F-O-a-110H (*)
179	L	:	KD109-a-308L (.)	K-F-O-a-113L (*)
182	L	:	/	K-F-O-a-116V (:)
201	L	:	/	K-F-O-a-133L (:)
202	V	:	/	/
205	Y	:	/	K-F-O-a-137[YF] (:)
209	G	*	/	K-F-O-a-141G (*)
211	L	.	/	K-F-O-a-143L (*)
240	I	*	KD109-a-397I (.)	K-F-O-a-172I (:)
245	A	.	/	K-F-O-a-177A (.)
248	L	:	KD109-a-405L (.)	K-F-O-a-180L (:)
251	L	:	KD109-a-408L (:)	K-F-O-a-183L (*)
252	H	*	/	K-F-O-a-184H (*)
264	H	*	/	K-F-O-a-193H (*)
266	D	.	/	K-F-O-a-195D (*)
267	I	:	KD109-a-424I (.)	K-F-O-a-196L (:)
268	K	.	/	K-F-O-a-197K (*)
271	N	:	/	K-F-O-a-200N (*)
272	I	:	KD109-a-429I (:)	K-F-O-a-201I (:)
273	L	:	/	K-F-O-a-202L (:)
274	L	:	KD109-a-431L (:)	K-F-O-a-203L (*)
282	V	:	KD109-a-440I (:)	K-F-O-a-211V (:)
284	D	*	/	K-F-O-a-213D (*)
286	G	*	/	K-F-O-a-215G (*)
287	L	:	/	/
313	G	.	/	K-F-O-a-242G (*)
314	Y	:	/	K-F-O-a-243Y (*)
317	P	*	/	K-F-O-a-246P (*)
318	E	*	/	K-F-O-a-247E (*)
327	T	.	/	K-F-O-a-255T (:)
331	D	*	KD109-a-522D (:)	K-F-O-a-259D (*)
332	V	:	/	/
333	Y	:	/	K-F-O-a-261[YF] (:)
334	S	.	/	K-F-O-a-262S (*)
336	G	*	KD109-a-527G (*)	K-F-O-a-264G (*)
337	V	:	/	K-F-O-a-265I (:)
338	V	:	/	K-F-O-a-266L (:)
340	L	:	/	K-F-O-a-268M (:)
341	E	:	/	K-F-O-a-269E (*)
342	L	:	KD109-a-534L (.)	K-F-O-a-270L (.)
344	T	:	/	/
345	G	.	/	/
435	A	.	/	/
438	C	*	KD109-a-625C (.)	K-F-O-a-350C (*)
446	R	*	KD109-a-635R (:)	K-F-O-a-358R (*)
456	L	:	KD109-a-645L (.)	K-F-O-a-368L (*)
NOTE: "*" indicates 100% conservation; ":" indicates extremely high conservation; "." indicates high conservation; "/" indicates non-conserved site. All of them are based on Clustal Omega. A series of approximately consecutive conserved amino acid sites are framed. The blue boxes are the high conservation sites in group 109 KD-n and KD-F-O. The red boxes are the most potentially immune-related si…
Full aligned sequence		24 KD-p	RRRKQKIGSSLDAMDGRI+R+WNMRKRKRRK+QP+EKLLESEL++VSSA++++W+G+N+RQG+++EPLSI+S SGQSS+V+++LSFFEG+++KFTLEDLLAEATDNFSSAN+IGSGGFGTVYKA+LEDG++VVAVKKLKD+S+GG +++YS++TQG++EF+AEMETLSANAFGRIRPHRNLVRLLGYCSSK+GDF+GNEEKLLVYEYMPNGSLA+VLH GNR+EETS+GEGR+VLDWETRLKIALGAARGLAYLHHENDC+VPPIIHRDIKSSNILLDEDFEA+VSDFGLA KLLLSD+D++++SHVSTSAVAGT+GYIAPEY+QQTGR+TEKSDVYSFGVVLLELLTGKRPTDPSFG++EEG+ NLVGWV+SVLREG++S++AEDGAMNQDSLGNYR+…
		109 KD-n	HR++R+CLRKKRRKK+DSKFRM++EYGR+RGSTR+T++FLP+SRPFEVEKNNN+KQRM+++KHRPS+TN+SS EV+KESSSPGFSKGKL+SADWSCLRRN+YS+GDFK+EES+Q+SPL+SAPT++LDSNPS+S+WKKS+DR+SSK GFSKRKPS+A++++AFSRTGSSSSSAVKVSEGEGKLVVFDKSLGLLLFQKRRFTLEDLLKATANFSEENVLG KPGGGSNRPRSSGSGFGTVYKAVLP+DGSGTVAATFTSGST++VVAVKRLSDSS+S+N+++D++S++KSAQG EKEFEAEVELLGRL+RHPNLVRLLGYCSEC++RDDQ++K++DQERLLVYEYMPNGSLADLLHGKRE+RTN++ DW++DTWE+++++SSS+S+EGGT+++KPLDWETR…
		KD-F-O	TRI+H+C+KKKKRRK+K+ESPSPTNQSYLKSEL+SAL+LKRF+YKELE+ATGGFSS+NIIGS++L+TVYKGT LEHDGK+VAVK+LNLKQFSAESDK+F+TECKTLSQLRHRNLVKVLGYCSSLAWESGK+KALVLE+MEKG+LD DW+H+PPQENSEP+EP++ILTL+ERI+IAIDIASGLDYLHSGYDFPIVHCDLKPSNILLD+DMVAHVSDFGT AR+LGVHLEDGSSSTSS+SAFEGTIGYLAPEFAYMRKVTTK+DV+SFGILLMELFTKRRPTDLSFEDG+PLT LRQLVEKAL+DG+++ML+VLDPEL++S++ILEMEYKLHDNEGGVS+KEEE++EK+LKLALSCTS++PEDRPD MNEVLRSLVKLRGK++S+++D+KEDLEVRDAVQS…
